# Supplementary material
Source: publisher figshare collection journal article supplement (https://gsajournals.figshare.com/ndownloader/files/14257919)
Supplement: Supplementary file 1 [file 14257919]

## Sheet: Blad1
Table S1. Genes located within highly differentiated region chr1: 169,950,000-170,220,000 within growth1 QTL.
chr	start	stop	strand	gene_id	gene_name	gene_biotype	gene_version	source	feature
1	169372228	169377659	+	ENSGALG00000017011	TRIM13	protein_coding	5	ensembl	gene
1	169378600	169381603	+	ENSGALG00000017012	KCNRG	protein_coding	5	ensembl	gene
1	169399051	169399134	-	ENSGALG00000018254	gga-mir-16-1	miRNA	1	ensembl	gene
1	169399193	169399275	-	ENSGALG00000018255	gga-mir-15a	miRNA	1	ensembl	gene
1	169415059	169415137	+	ENSGALG00000028232	DLEU2_5	misc_RNA	1	ensembl	gene
1	169825218	169833288	-	ENSGALG00000017014	DLEU7	protein_coding	4	ensembl	gene
1	169902418	169946212	+	ENSGALG00000017015	RNASEH2B	protein_coding	6	ensembl	gene
1	169944440	169944694	-	ENSGALG00000035652	novel	protein_coding	1	ensembl	gene
1	169989919	169993797	-	ENSGALG00000030649	orthologous to C13orf42	protein_coding	1	ensembl	gene
1	170018328	170038158	+	ENSGALG00000031717	novel	lincRNA	2	ensembl	gene
1	170047103	170056011	+	ENSGALG00000017016	FAM124A	protein_coding	4	ensembl	gene
1	170079454	170098133	+	ENSGALG00000017017	SERPINE3	protein_coding	5	ensembl	gene
1	170099461	170140361	-	ENSGALG00000017018	INTS6	protein_coding	5	ensembl	gene
1	170157889	170223517	+	ENSGALG00000017019	orthologous to WDFY2	protein_coding	4	ensembl	gene
1	170260135	170261034	-	ENSGALG00000040321	orthologous to DHRS12	protein_coding	1	ensembl	gene
